# Supplementary material for: Targeted Delivery of Arctigenin Using Sialic Acid Conjugate-Modified Liposomes for the Treatment of Breast Cancer
Source: MDPI journal article supplement (doi:10.3390/molecules29010278), 2024-01-04
Supplement: s1 [file s1]

Table S1.  $H'_j$  and  $W'_j$  of encapsulation efficiency, drug loading, and particle size after process optimization

| Indicators                | $H'_j$ | $W'_j$ |
|---------------------------|--------|--------|
| Encapsulation rate (ER,%) | 0.914  | 0.352  |
| drug loading (DL,%)       | 0.912  | 0.362  |
| particle size (Size, nm)  | 0.930  | 0.287  |

The entropy weight method is an objective empowerment method that can be used to calculate the weight of each evaluation index in a complex system. For an evaluation index, the smaller the information entropy ( $H_j$ ), the larger the weight coefficient ( $W_j$ ), and the greater the role in the comprehensive evaluation; otherwise, the smaller the index plays in the comprehensive evaluation. The calculation steps are performed as follows:

(1) Undimensionless treatment of the original matrix

Due to the incommensurability among multiple evaluation indicators, the raw data needs to be dimensionless. Assuming a total of  $a$  formulation prescription and  $b$  evaluation index, the original matrix  $X = (x_{ij})_{ab}$ , where  $x_{ij}$  represents the value of the  $j$ th evaluation index of the  $i$ th formulation prescription.

For the positive indicator, the formula is:

$$y_{ij} = \frac{x_{ij} - (x_{ij})_{\min}}{(x_{ij})_{\max} - (x_{ij})_{\min}}$$

For the negative indicator, the formula is:

$$y_{ij} = \frac{(x_{ij})_{\max} - x_{ij}}{(x_{ij})_{\max} - (x_{ij})_{\min}}$$

Where  $i$  represents the sample value ( $i=1,2,3,\dots, a$ ), and  $j$  represents the index value ( $j=1,2,3,\dots, b$ ). The undimensionalized matrix is  $Y = (y_{ij})_{ab}$ . They are the positive indicator formula for the EE and drug load, meaning the better the sample prescription; while for the negative indicator, the smaller the  $y_{ij}$ , the better the sample prescription.

(2) Calculate the specific weight of  $P_{ij}$

Convert the dimensionless matrix into a probability matrix ( $P_{ij}$ ):

$$P_{ij} = \frac{y_{ij}}{\sum_{i=1}^n y_{ij}}$$

(3) Calculate the entropy  $H_j$

$H_j$  is the entropy of the  $j$ -th evaluation index:

$$H_j = -\frac{1}{\ln n} \sum_{i=1}^n P_{ij} \ln P_{ij}$$

(4) Calculate the weight  $W_j$

$W_j$  represents the weight of the  $j$  th evaluation index:

$$W_j = \frac{g_j}{\sum_{i=1}^n g_j}$$

$$(g_j = 1 - H_j)$$

Calculate the composite score ( $v_j$ ):

$$v_j = \sum_{i=1}^m W_j y_{ij}$$

Table S2. List of dependent and independent variables in the Box-Behnken Design

| Independent Variables |                                | Levels   |                  |          |
|-----------------------|--------------------------------|----------|------------------|----------|
|                       |                                | Low (-1) | Intermediate (0) | High (1) |
| X <sub>1</sub>        | drug-to-lipid mass ratio (w/w) | 1:25     | 1:20             | 1:15     |
| X <sub>2</sub>        | volume of aqueous phase (mL)   | 5        | 7.5              | 10       |
| X <sub>3</sub>        | ultrasound time (min)          | 2        | 6                | 10       |
| Dependent variables   |                                | Goal     |                  |          |
| Y <sub>1</sub>        | ER, %                          | higher   |                  |          |
| Y <sub>2</sub>        | DL, %                          | higher   |                  |          |
| Y <sub>3</sub>        | Size, nm                       | lower    |                  |          |

Table S3. Design and Results of the Box-Behnken Design

| Num | Independent Variables |                |                | Responses      |                |                | Score |
|-----|-----------------------|----------------|----------------|----------------|----------------|----------------|-------|
|     | X <sub>1</sub>        | X <sub>2</sub> | X <sub>3</sub> | Y <sub>1</sub> | Y <sub>2</sub> | Y <sub>3</sub> |       |
| 1   | -1                    | 0              | 1              | 81.8           | 3.29           | 101            | 23.0  |
| 2   | -1                    | 1              | 0              | 85.5           | 3.29           | 109            | 29.0  |
| 3   | 1                     | -1             | 0              | 87.2           | 5.21           | 105            | 73.3  |
| 4   | 1                     | 0              | -1             | 86.5           | 5.18           | 134            | 52.3  |
| 5   | 0                     | 0              | 0              | 90.7           | 4.38           | 110            | 65.2  |
| 6   | -1                    | 0              | -1             | 89.8           | 3.54           | 138            | 29.3  |
| 7   | -1                    | -1             | 0              | 90.4           | 3.57           | 97.4           | 57.1  |
| 8   | 0                     | -1             | 1              | 89.5           | 4.24           | 91.6           | 70.4  |
| 9   | 0                     | 0              | 0              | 87.7           | 4.25           | 104            | 57.1  |
| 10  | 0                     | 0              | 0              | 88.9           | 4.20           | 105            | 59.3  |
| 11  | 0                     | 1              | -1             | 83.7           | 4.00           | 137            | 19.8  |
| 12  | 0                     | 1              | 1              | 82.4           | 3.77           | 101            | 33.7  |
| 13  | 0                     | 0              | 0              | 88.7           | 4.09           | 105            | 56.6  |
| 14  | 0                     | 0              | 0              | 89.1           | 4.34           | 107            | 61.6  |
| 15  | 1                     | 0              | 1              | 82.5           | 4.98           | 95.6           | 60.2  |
| 16  | 0                     | -1             | -1             | 93.1           | 4.49           | 127            | 64.5  |
| 17  | 1                     | 1              | 0              | 83.5           | 4.70           | 114            | 46.7  |

Table S4. Variance analysis of Score in BBD

| Source of Variation           | Sum of Squares | Degrees of Freedom | Mean Square Value | <i>F</i> -Value | <i>P</i> -Value |                  |
|-------------------------------|----------------|--------------------|-------------------|-----------------|-----------------|------------------|
| Model                         | 4394           | 9                  | 488.2             | 12.9            | <b>0.0014</b>   | Very significant |
| X <sub>1</sub>                | 1109           | 1                  | 1109.0            | 29.2            | <b>0.0010</b>   |                  |
| X <sub>2</sub>                | 2318           | 1                  | 2317.5            | 61.0            | <b>0.0001</b>   |                  |
| X <sub>3</sub>                | 57.3           | 1                  | 57.3              | 1.51            | 0.2588          |                  |
| X <sub>1</sub> X <sub>2</sub> | 0.516          | 1                  | 0.516             | 0.0136          | 0.9105          |                  |
| X <sub>1</sub> X <sub>3</sub> | 50.0           | 1                  | 50.0              | 1.32            | 0.2890          |                  |
| X <sub>2</sub> X <sub>3</sub> | 15.6           | 1                  | 15.6              | 0.411           | 0.5421          |                  |
| X <sub>1</sub> <sup>2</sup>   | 216            | 1                  | 216.04            | 5.69            | 0.0485          |                  |
| X <sub>2</sub> <sup>2</sup>   | 7.01           | 1                  | 7.01              | 0.185           | 0.6804          |                  |
| X <sub>3</sub> <sup>2</sup>   | 566            | 1                  | 565.6             | 14.9            | <b>0.0062</b>   |                  |
| Residual                      | 265            | 7                  | 38.0              |                 |                 | not significant  |
| Lack of fit                   | 216            | 3                  | 72.0              | 5.78            | 0.0617          |                  |
| Pure Error                    | 49.8           | 4                  | 12.5              |                 |                 |                  |
| Cor total                     | 4660           | 16                 |                   |                 |                 |                  |

Table S5. Characterization of optimized liposomes (mean $\pm$ SD, n=3)

|            | pH              | Size(nm)        | PDI               | $\zeta$ (mV)   | EE (%)         | DL (%)          |
|------------|-----------------|-----------------|-------------------|----------------|----------------|-----------------|
| ARG@Lip    | 6.35 $\pm$ 0.04 | 97.4 $\pm$ 2.1  | 0.258 $\pm$ 0.003 | 20.6 $\pm$ 2.0 | 90.3 $\pm$ 0.5 | 4.80 $\pm$ 0.04 |
| ARG@SA-Lip | 6.49 $\pm$ 0.03 | 101.1 $\pm$ 3.7 | 0.254 $\pm$ 0.004 | 15.6 $\pm$ 1.6 | 91.4 $\pm$ 0.4 | 4.54 $\pm$ 0.02 |

Table S6. Fitting results of release behaviors of different formulations in pH 7.4 and pH 5.2 medium (n = 3)

| Formulations | Release model   | pH  | Fitting equation               | $R^2$        |
|--------------|-----------------|-----|--------------------------------|--------------|
| Arg@Lip      | Zero-order      | 7.4 | $Q = 2.74t + 40.9$             | 0.558        |
|              |                 | 5.2 | $Q = 2.77 t + 39.2$            | 0.588        |
|              | First-order     | 7.4 | $Q = 86.5(1 - e^{-0.3599 t})$  | <b>0.988</b> |
|              |                 | 5.2 | $Q = 86.3(1 - e^{-0.3275 t})$  | 0.985        |
|              | Higuchi         | 7.4 | $Q = 17.9 t^{1/2} + 18.7173$   | 0.801        |
|              |                 | 5.2 | $Q = 17.9 t^{1/2} + 17.1$      | 0.826        |
|              | Ritger - peppas | 7.4 | $Q = 36.7t^{0.322}$            | 0.874        |
|              |                 | 5.2 | $Q = 35.1 t^{0.331}$           | 0.890        |
| Arg@SA-Lip   | Zero-order      | 7.4 | $Q = 3.19 t + 30.2$            | 0.551        |
|              |                 | 5.2 | $Q = 2.92 t + 39.7$            | 0.592        |
|              | First-order     | 7.4 | $Q = 87.6 (1 - e^{-0.246 t})$  | <b>0.961</b> |
|              |                 | 5.2 | $Q = 90.6 (1 - e^{-0.3024 t})$ | 0.982        |
|              | Higuchi         | 7.4 | $Q = 20.6 t^{1/2} + 4.62$      | 0.784        |
|              |                 | 5.2 | $Q = 18.9 t^{1/2} + 16.5$      | 0.828        |
|              | Ritger - peppas | 7.4 | $Q = 27.7t^{0.407}$            | 0.814        |
|              |                 | 5.2 | $Q = 35.6 t^{0.340}$           | 0.887        |

Table S7. Tumor inhibition rate in mice after different treatment for 14 days

|              | In volume (%)             | In weight (%)             |
|--------------|---------------------------|---------------------------|
| Positive     | 65.6 ± 11.9               | 61.7 ± 10.3               |
| Arg@solution | 34.5 ± 8.3 <sup>**</sup>  | 26.9 ± 8.9 <sup>***</sup> |
| Arg@Lip      | 40.8 ± 14.4 <sup>**</sup> | 42.1 ± 10.5 <sup>**</sup> |
| Arg@SA-Lip   | 51.9 ± 11.7               | 52.0 ± 7.8                |

<sup>\*</sup> $P < 0.05$ , <sup>\*\*</sup> $P < 0.01$ , <sup>\*\*\*</sup> $P < 0.001$ , compared with positive.
